# Supplementary material for: Activin signaling as an emerging target for therapeutic interventions
Source: Springer Nature journal article supplement (doi:10.1186/1478-811x-7-15), 2009-06-18
Supplement: Additional file 1 [file 1478-811x-7-15-s1.pdf]

Table 1. Ligand/receptor combination for activin and related factors

| <b>Ligand</b> | <b>Type II Receptor</b> | <b>Type I Receptor</b> | <b>Coreceptor</b> | <b>Smad</b>               |
|---------------|-------------------------|------------------------|-------------------|---------------------------|
| Activin A     | ActRIIA, IIB            | ALK4, (7)              | -                 | Smad 2,3<br>with<br>Smad4 |
| Activin B     | ActRIIA, IIB            | ALK7, (4)              | -                 |                           |
| Activin AB    | ActRIIA, IIB            | ALK4, 7                | -                 |                           |
| Inhibin A, B  | ActRIIA, IIB            | -                      | Betaglycan        |                           |
| Myostatin     | ActRIIB, (IIA)          | ALK5, (4)              | -                 | Smad 2,3<br>with<br>Smad4 |
| GDF11         | ActRIIB, IIA            | ALK4, 5                | -                 |                           |
| Nodal         | ActRIIB, IIA            | ALK4, 7                | Cripto            | Smad 2,3<br>with<br>Smad4 |

Note: weak interaction of ActRIIA and ALK4 with myostatin.  
 weak interaction of ALK7 with activin A.  
 weak interaction of ALK4 with activin B.
