# Supplementary material for: Activin signaling as an emerging target for therapeutic interventions
Source: Springer Nature journal article supplement (doi:10.1186/1478-811x-7-15), 2009-06-18
Supplement: Additional file 2 [file 1478-811x-7-15-s2.pdf]

Table 2. Activin signaling as a target for therapeutic interventions

| <b>Disease</b>                       | <b>Therapeutic strategy</b>                        | <b>Methods</b>                  | <b>Ref</b>           |
|--------------------------------------|----------------------------------------------------|---------------------------------|----------------------|
| Muscular dystrophy<br>Muscle atrophy | Increase of muscle mass<br>by myostatin inhibition | Monoclonal MSTN Ab              | [60, 65, 72]         |
|                                      |                                                    | MSTN propeptide                 | [62, 63, 64]         |
|                                      |                                                    | Soluble ActRIIB-Fc              | [63, 70]             |
|                                      |                                                    | Follistatin and its derivatives | [66, 67, 73, 116]    |
|                                      |                                                    | HDAC inh                        | [113]                |
|                                      |                                                    | MSTN siRNA                      | [117]                |
| Osteoporosis                         | Increase of bone mass<br>by activin inhibition     | Soluble ActRIIA-Fc              | [78]                 |
|                                      |                                                    | Inhibin A                       | [79]                 |
| Cancer                               |                                                    |                                 |                      |
| tumor growth                         | Suppression by<br>activin activation               | Cripto silencing                | [81]                 |
|                                      |                                                    | FLRG silencing                  | [82]                 |
| cachexia                             | Activin inhibition                                 | Soluble ActRIIA-Fc              | [88]                 |
|                                      | Myostatin inhibition                               | Follistatin, MSTN propeptide    | [115]                |
| metastasis                           | Activin inhibition                                 | Follistatin                     | [90]                 |
| angiogenesis<br>and motility         | Suppression by<br>TGF- $\beta$ /activin inhibition | ALK4, 5, 7 kinase inhibitors    | [89, 91, 92, 94]     |
| Neuron damage<br>Depression          | Recombinant Activin A<br>application               | Activin A                       | [102, 103, 104, 108] |

Abbreviations: MSTN, myostatin; HDAC inh, histone deacetylase inhibitor
